# Supplementary material for: First-in-Human Intravenous Seprehvir in Young Cancer Patients: A Phase 1 Clinical Trial
Source: PubMed Central journal article supplement — Mol Ther. 2019 Sep 10;27(11):1930–8. doi: 10.1016/j.ymthe.2019.08.020 (PMC6838937; doi:10.1016/j.ymthe.2019.08.020), 2019-09-10
Supplement: mmc1.pdf [file mmc1.pdf]

## **Supplemental Information**

### **First-in-Human Intravenous Seprehvir in Young**

### **Cancer Patients: A Phase 1 Clinical Trial**

**Keri A. Streby, Mark A. Currier, Melinda Triplet, Kristy Ott, Devon J. Dishman, Michele R. Vaughan, Mark A. Ranalli, Bhuvana Setty, Micah A. Skeens, Stacy Whiteside, Nicholas D. Yeager, Kellie B. Haworth, Kathleen Simpson, Joe Conner, and Timothy P. Cripe**

**Supplemental Table 1.** Dose administered based on post-injection titers.

| <b>Patient</b> | <b>Assay Date</b> | <b>Titer (plaque forming units)</b> |
|----------------|-------------------|-------------------------------------|
| HSV 01         | 2/7/14            | 2600000                             |
| HSV 02         | 10/9/14           | 24000*                              |
| HSV 03         | 6/1/15            | 1500000                             |
| HSV 04         | 4/21/16           | 2400000                             |
| HSV 05         | 8/11/16           | 1400000                             |
| HSV 06         | 9/21/16           | 1500000                             |
| HSV 06- EAU    | 11/3/16           | 2800000                             |
| HSV 06- EAU    | 11/10/16          | 1800000                             |
| HSV 07         | 2/10/17           | 7000000                             |
| HSV 08         | 7/25/17           | 3400000**                           |
| HSV 09         | 1/17/18           | 3700000                             |

**Supplemental Table 1.** Clinical vial titers were determined by the tissue culture inhibitor dose-50 quantal method expressed as infectious units (iu) whereas post-injection titers were determined by direct quantitative plaque formation method expressed as plaque forming units (pfu). 1 iu = 1 pfu. \* = freeze-thawed after storage in lactate ringer solution; \*\* = freeze-thawed after storage in 10% glycerol
